# Supplementary material for: Synthesis of Novel Diketopyrrolopyrrole-Rhodamine Conjugates and Their Ability for Sensing Cu2+ and Li+
Source: MDPI journal article supplement (doi:10.3390/molecules27217219), 2022-10-25
Supplement: s1 [file s1]

# Synthesis of Novel Diketopyrrolopyrrole-Rhodamine Conjugates and Their Ability for Sensing $\text{Cu}^{2+}$ and $\text{Li}^+$

Carla Queirós <sup>1,†</sup>, Vítor A. S. Almodôvar <sup>2,†</sup>, Fábio Martins <sup>1</sup>, Andreia Leite <sup>1</sup>, Augusto C. Tomé <sup>2</sup> and Ana M. G. Silva <sup>1,\*</sup>

<sup>1</sup> LAQV-REQUIMTE, Department of Chemistry and Biochemistry, University of Porto, 4169-007 Porto, Portugal

<sup>2</sup> LAQV-REQUIMTE, Department of Chemistry, University of Aveiro, 3810-193 Aveiro, Portugal

\* Correspondence: ana.silva@fc.up.pt; +351-2-2040-2585

† These authors contributed equally.

## Content

|                                                                                                                                                                 |    |
|-----------------------------------------------------------------------------------------------------------------------------------------------------------------|----|
| <sup>1</sup> H NMR and <sup>13</sup> C NMR of chemosensors 1 and 2.....                                                                                         | 2  |
| MS of chemosensors 1 and 2.....                                                                                                                                 | 4  |
| Spectroscopic properties of precursors DPP(CHO) <sub>2</sub> and RhoHyd .....                                                                                   | 5  |
| UV-Vis and fluorescence: solution studies for 1 and 2 towards anions and cations.....                                                                           | 6  |
| UV-Vis and fluorescence: solution studies for DPP(CHO) <sub>2</sub> and RhoHyd towards anions and cations .....                                                 | 7  |
| Absorbance and fluorescence measurements of chemosensor 2 in the presence of $\text{Cu}^{2+}$ .....                                                             | 8  |
| Absorbance and fluorescence measurements of chemosensors 1+ $\text{Cu}^{2+}$ and 2+ $\text{Cu}^{2+}$ in the presence of $\text{Li}^+$ .....                     | 9  |
| Absorbance and fluorescence measurements of chemosensor 2+ $\text{Cu}^{2+}$ in the presence of $\text{Li}(\text{CH}_3\text{COO})$ and $\text{LiBr}$ salts ..... | 10 |
| Absorbance and fluorescence measurements of chemosensors 1+ $\text{Cu}^{2+}$ and 2+ $\text{Cu}^{2+}$ in the presence of $\text{CN}^-$ .....                     | 10 |
| Stern-Volmer graphical representations of chemosensor 1+ $\text{Cu}^{2+}$ in the presence of $\text{CN}^-$ .....                                                | 11 |

**$^1\text{H}$  NMR and  $^{13}\text{C}$  NMR of chemosensors 1 and 2**

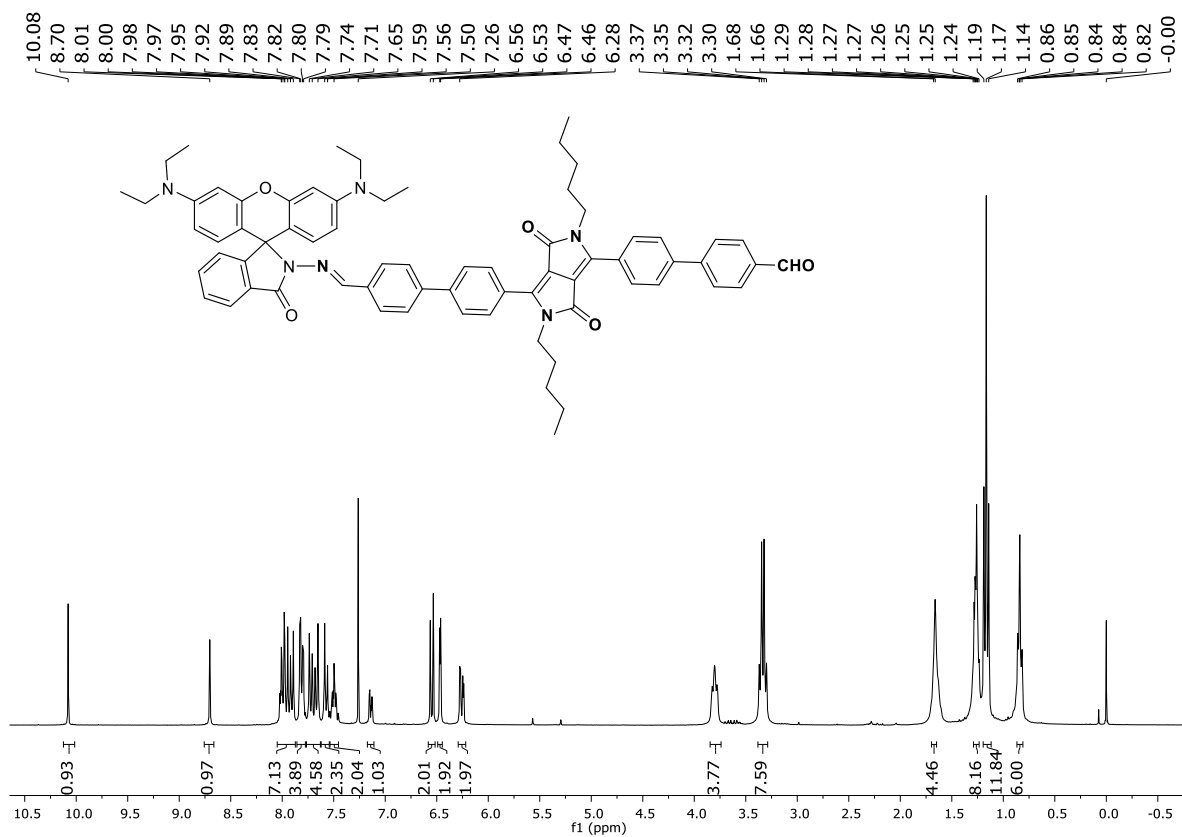

**Figure S1.**  $^1\text{H}$  NMR spectrum of chemosensor 1.

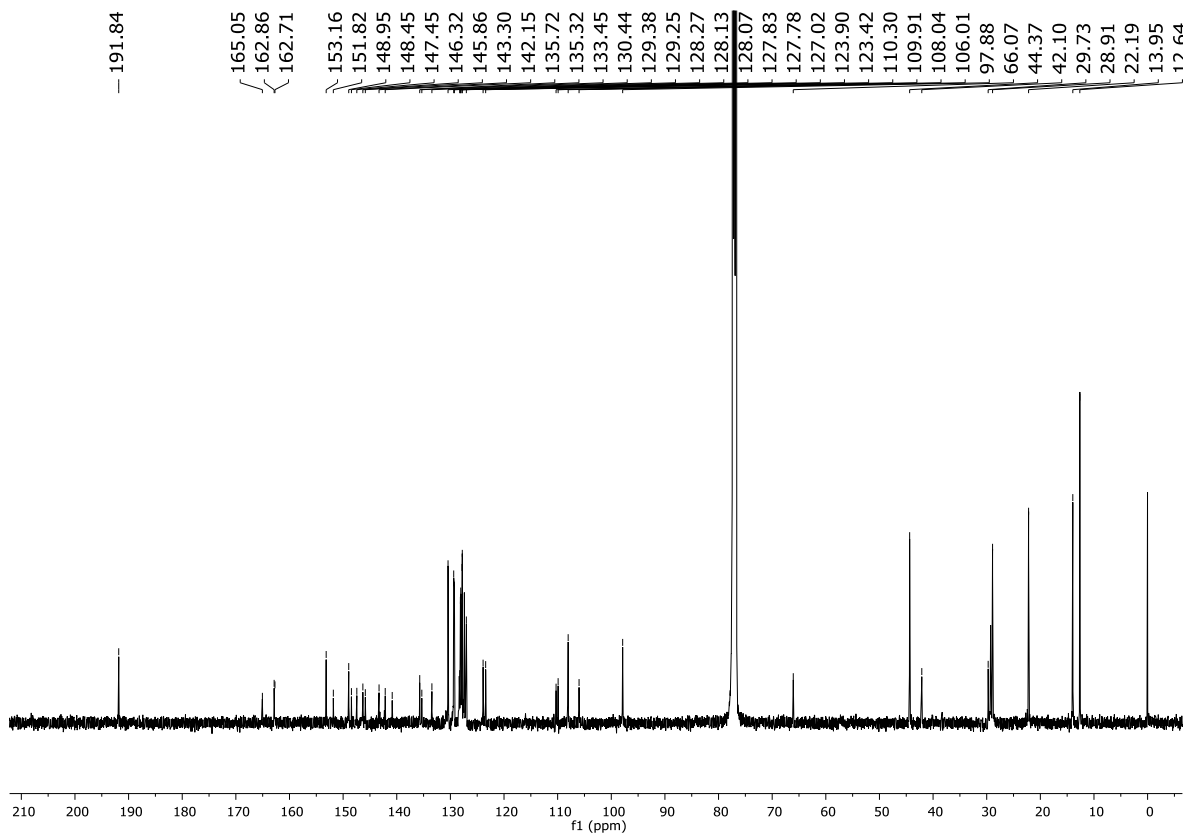

**Figure S2.**  $^{13}\text{C}$  NMR spectrum of chemosensor 1.

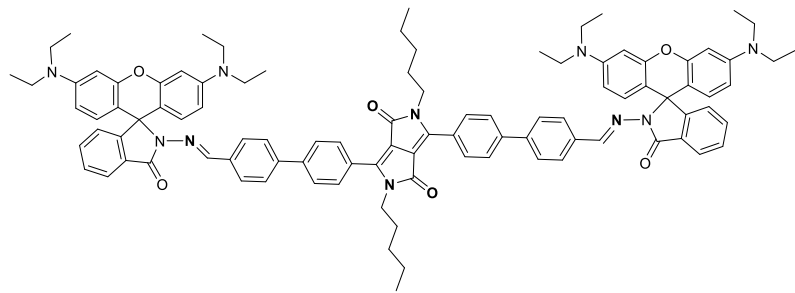

13C NMR spectrum (CDCl<sub>3</sub>) of compound 1. The x-axis is labeled 'f1 (ppm)' and ranges from 170 to 0. The spectrum shows numerous peaks, with the most intense at 77.92 ppm (CDCl<sub>3</sub> solvent). Other significant peaks are labeled with their chemical shifts: 165.93, 163.70, 154.07, 152.70, 149.87, 148.88, 147.31, 144.05, 141.80, 136.18, 134.30, 130.22, 130.12, 129.21, 129.01, 128.94, 128.24, 128.14, 127.91, 124.79, 124.30, 110.87, 108.94, 106.93, 98.79, 78.24, 77.92, 77.60, 66.98, 45.24, 43.01, 30.61, 29.80, 23.07, 14.82, 13.54, 13.54, and 0.90.

**Figure S4.**  $^{13}\text{C}$  NMR spectrum of chemosensor 2.

## MS of chemosensors 1 and 2

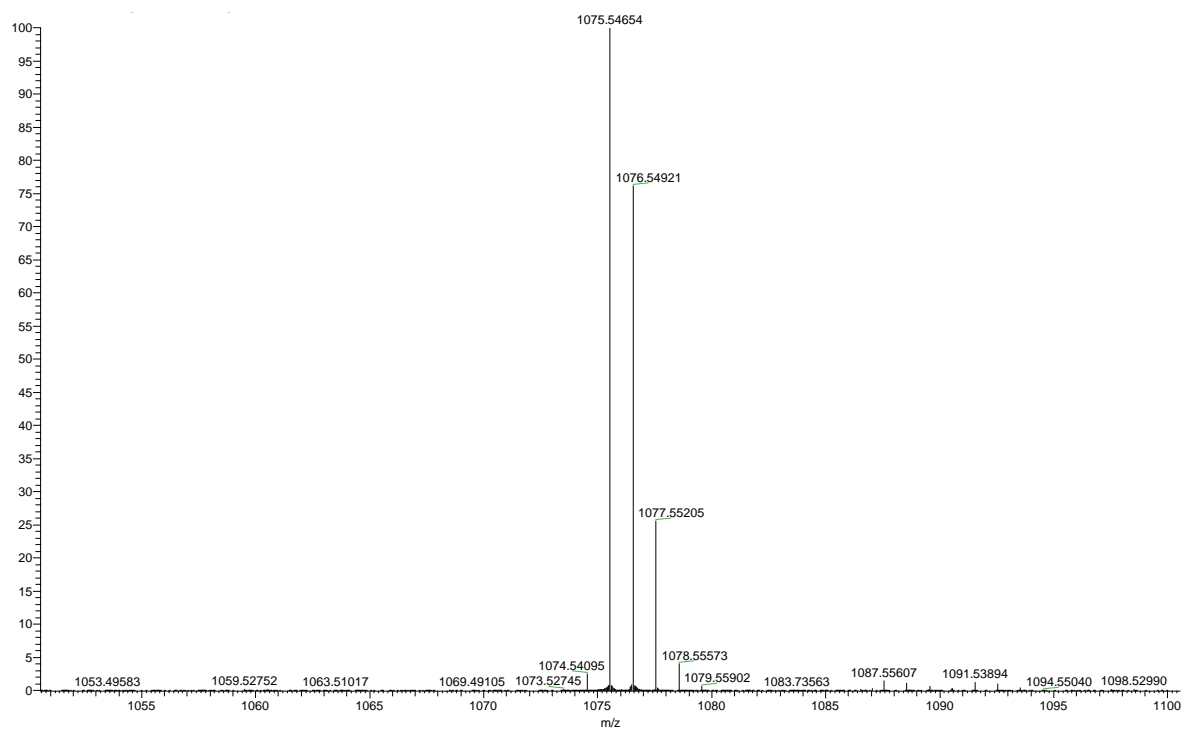

Figure S5. MS spectrum of chemosensor 1.

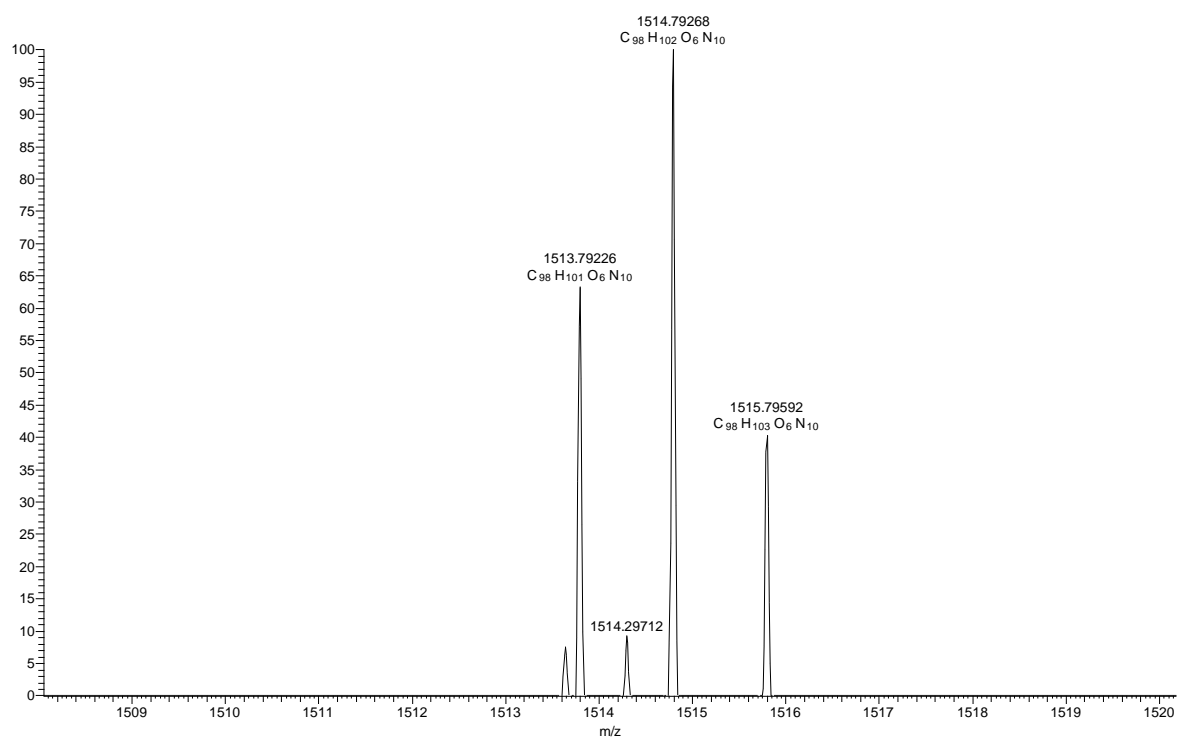

Figure S6. MS spectrum of chemosensor 2.

## Spectroscopic properties of precursors DPP(CHO)<sub>2</sub> and RhoHyd

**Table S1.** Spectroscopic properties ( $\lambda_{\text{abs}}$ ,  $\lambda_{\text{em}}$ , molar absorptivity ( $\epsilon$ ), Stokes shift, fluorescence quantum yield ( $\Phi_{\text{F}}$ ) and lifetime ( $\tau$ ) of the precursors in CH<sub>2</sub>Cl<sub>2</sub>, EtOH and CH<sub>3</sub>CN at 25 °C.

|                                 | $\lambda_{\text{abs}} / \text{nm}$<br>( $\epsilon \times 10^4 / \text{dm}^3\text{mol}^{-1}\text{cm}^{-1}$ ) | $\lambda_{\text{em}} / \text{nm}$ | Stokes Shift / nm | $\Phi_{\text{F}}$ | $\tau / \text{ns}$ |
|---------------------------------|-------------------------------------------------------------------------------------------------------------|-----------------------------------|-------------------|-------------------|--------------------|
| <b>DPP(CHO)<sub>2</sub></b>     |                                                                                                             |                                   |                   |                   |                    |
| CH <sub>2</sub> Cl <sub>2</sub> | 268 (2.39), 323 (4.94), 492 (2.28)                                                                          | 573                               | 80                | 0.92              | 4.8 ± 0.6          |
| EtOH                            | 316 (7.47), 485 (3.49)                                                                                      | 566                               | 81                | 0.88              | Non determined     |
| CH <sub>3</sub> CN              | 265 (3.62), 318 (7.50), 485 (3.62)                                                                          | 568                               | 83                | 0.88              | Non determined     |
| <b>RhoHyd</b>                   |                                                                                                             |                                   |                   |                   |                    |
| CH <sub>2</sub> Cl <sub>2</sub> | 275 (4.39), 316 (1.80)                                                                                      | -                                 | -                 | -                 | -                  |
| EtOH                            | 273 (4.12), 311 (1.53)                                                                                      | -                                 | -                 | -                 | -                  |
| CH <sub>3</sub> CN              | 273 (1.50), 313 (1.41)                                                                                      | -                                 | -                 | -                 | -                  |

# UV-Vis and fluorescence: solution studies for 1 and 2 towards anions and cations

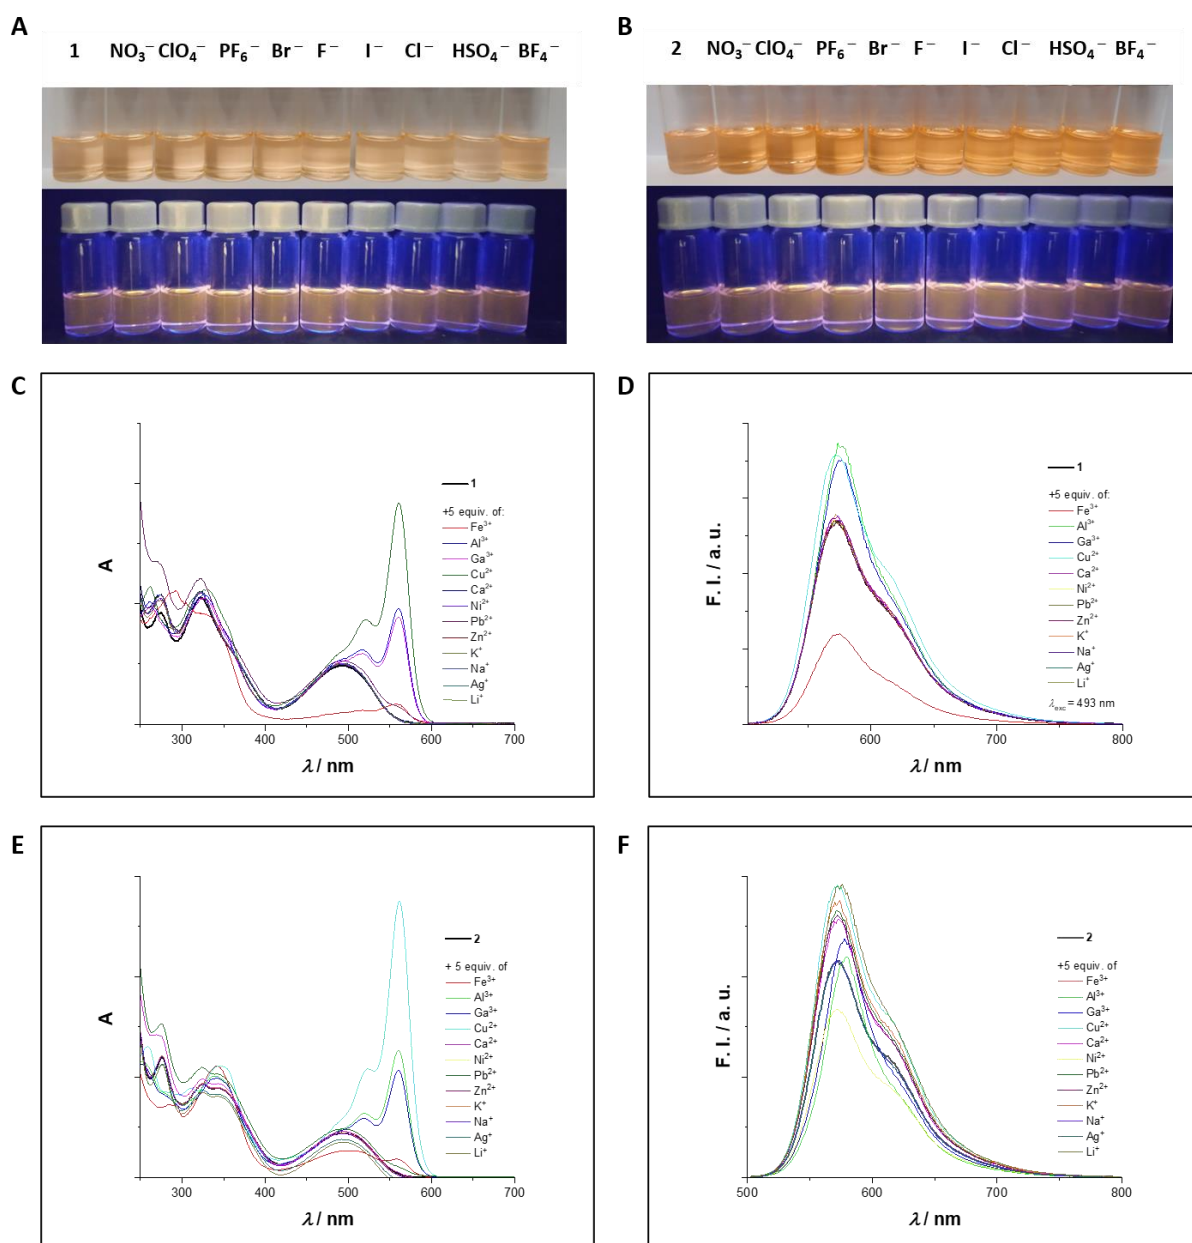

**Figure S7.** Photographs (up: visible and down: 354 nm lamp) of **1** (A) and **2** (B), in  $\text{CH}_2\text{Cl}_2$ , in the presence of 5 equiv. of anions ( $\text{NO}_3^-$ ,  $\text{ClO}_4^-$ ,  $\text{PF}_6^-$ ,  $\text{Br}^-$ ,  $\text{F}^-$ ,  $\text{I}^-$ ,  $\text{Cl}^-$ ,  $\text{HSO}_4^-$  and  $\text{BF}_4^-$ ) and absorption and fluorescence spectra of **1** (C and D) and **2** (E and F), in  $\text{CH}_2\text{Cl}_2$ , in the presence of 5 equiv. of cations ( $\text{Fe}^{3+}$ ,  $\text{Al}^{3+}$ ,  $\text{Ga}^{3+}$ ,  $\text{Cu}^{2+}$ ,  $\text{Ca}^{2+}$ ,  $\text{Ni}^{2+}$ ,  $\text{Pb}^{2+}$ ,  $\text{Zn}^{2+}$ ,  $\text{K}^+$ ,  $\text{Na}^+$ ,  $\text{Ag}^+$  and  $\text{Li}^+$ ).

## UV-Vis and fluorescence: solution studies for DPP(CHO)<sub>2</sub> and RhoHyd towards anions and cations

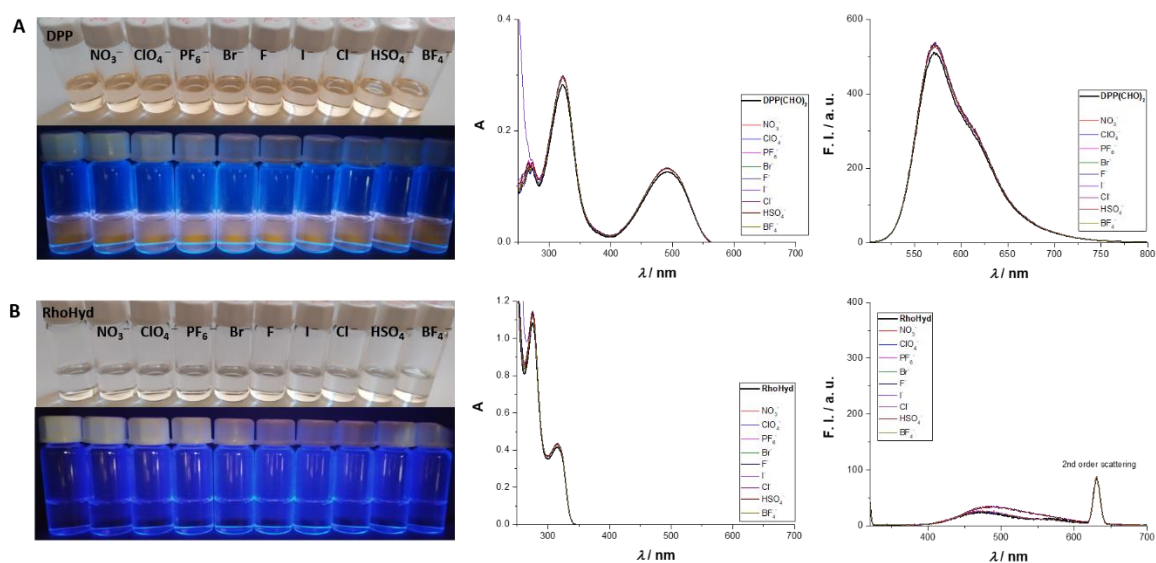

**Figure S8.** Photographs (up: visible and down: under a 354 nm lamp) and absorption and fluorescence spectra of **DPP(CHO)<sub>2</sub>** (A) and **RhoHyd** (B), in CH<sub>2</sub>Cl<sub>2</sub>, in the presence of 5 equiv. of anions (NO<sub>3</sub><sup>-</sup>, ClO<sub>4</sub><sup>-</sup>, PF<sub>6</sub><sup>-</sup>, Br<sup>-</sup>, F<sup>-</sup>, I<sup>-</sup>, Cl<sup>-</sup>, HSO<sub>4</sub><sup>-</sup> and BF<sub>4</sub><sup>-</sup>).

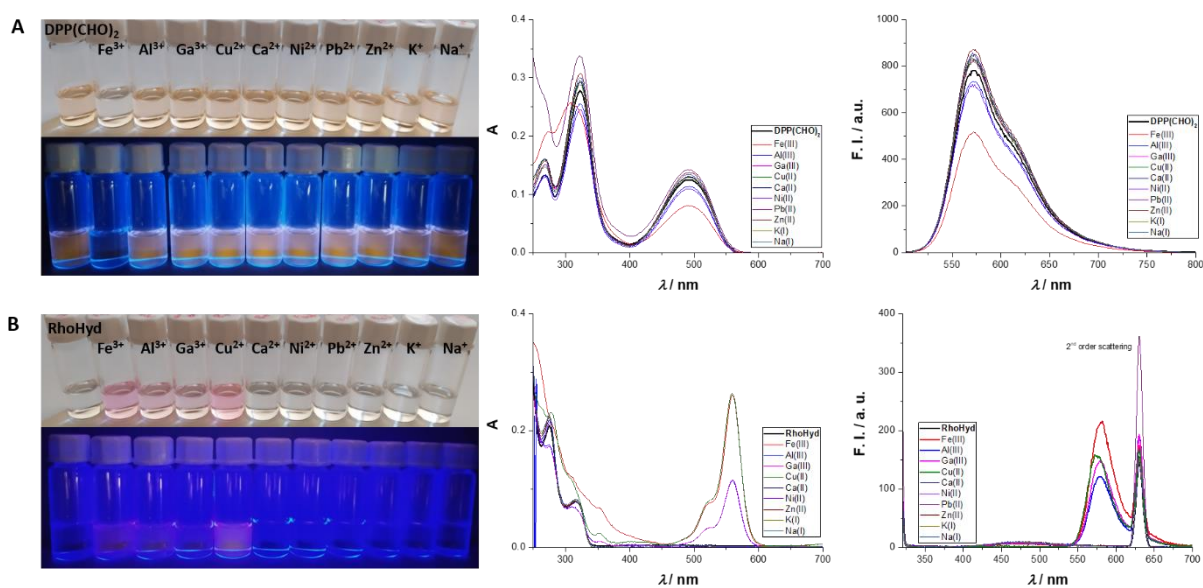

**Figure S9.** Photographs (up: visible and down: under a 354 nm lamp) and absorption and fluorescence spectra of **DPP(CHO)<sub>2</sub>** (A) and **RhoHyd** (B), in CH<sub>2</sub>Cl<sub>2</sub>, in the presence of 5 equiv. of cations (Fe<sup>3+</sup>, Al<sup>3+</sup>, Ga<sup>3+</sup>, Cu<sup>2+</sup>, Ca<sup>2+</sup>, Ni<sup>2+</sup>, Pb<sup>2+</sup>, Zn<sup>2+</sup>, K<sup>+</sup> and Na<sup>+</sup>).

# Absorbance and fluorescence measurements of chemosensor 2 in the presence of $\text{Cu}^{2+}$

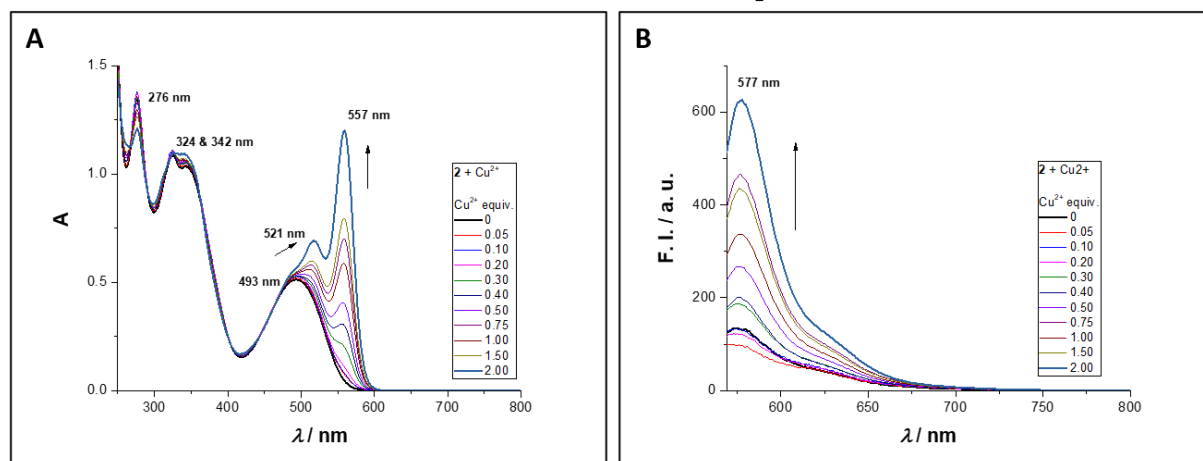

**Figure S10.** Absorbance (A) and fluorescence (B, using  $\lambda_{\text{exc}} = 557$  nm) spectra of chemosensor 2 with increasing concentrations of  $\text{Cu}^{2+}$  (up to 2 equiv.).

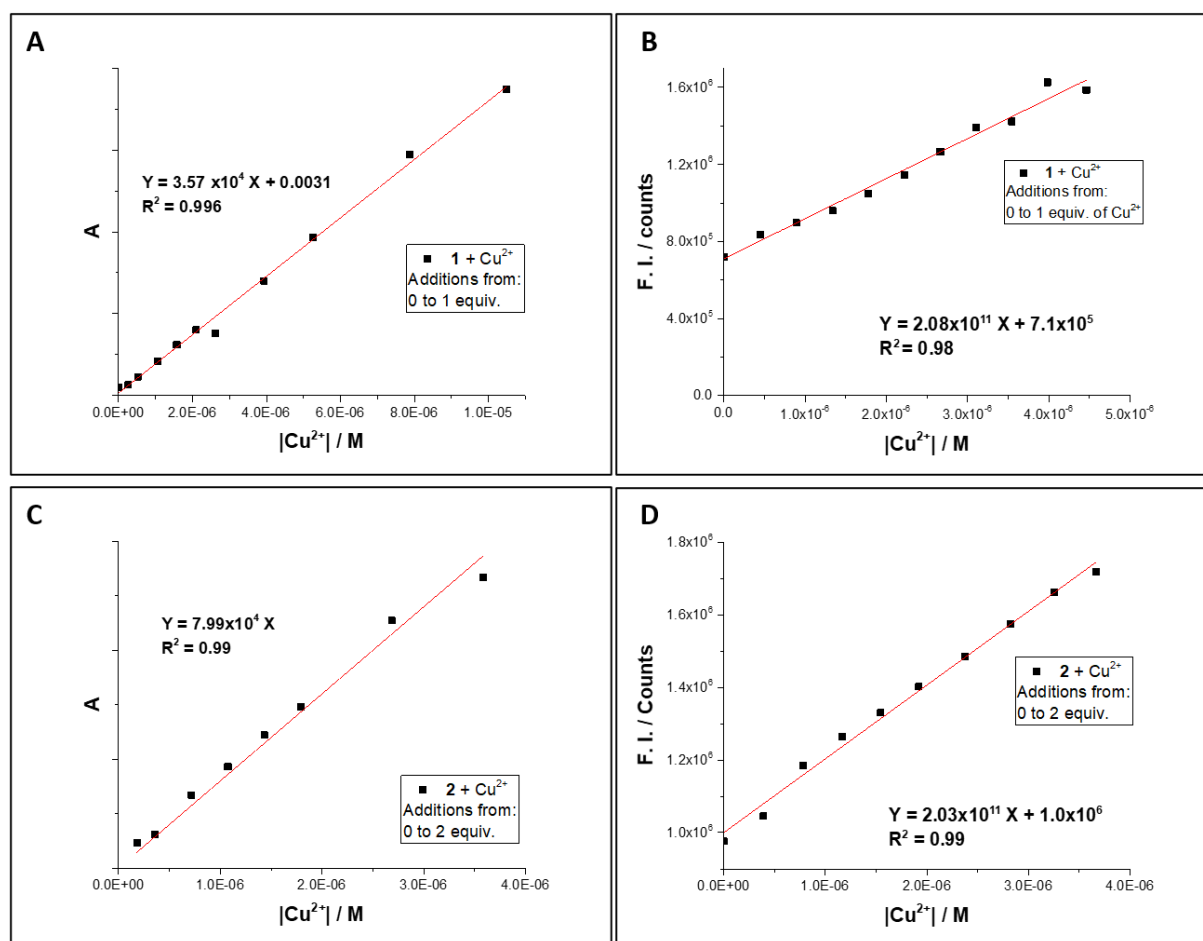

**Figure S11.** Absorption (A for 1 and C for 2) and fluorescence (B for 1 and D for 2) spectra of chemosensors 1 and 2 with increasing concentration of  $\text{Cu}^{2+}$ .



**Absorbance and fluorescence measurements of chemosensors 1+Cu<sup>2+</sup> and 2+Cu<sup>2+</sup> in the presence of Li<sup>+</sup>**

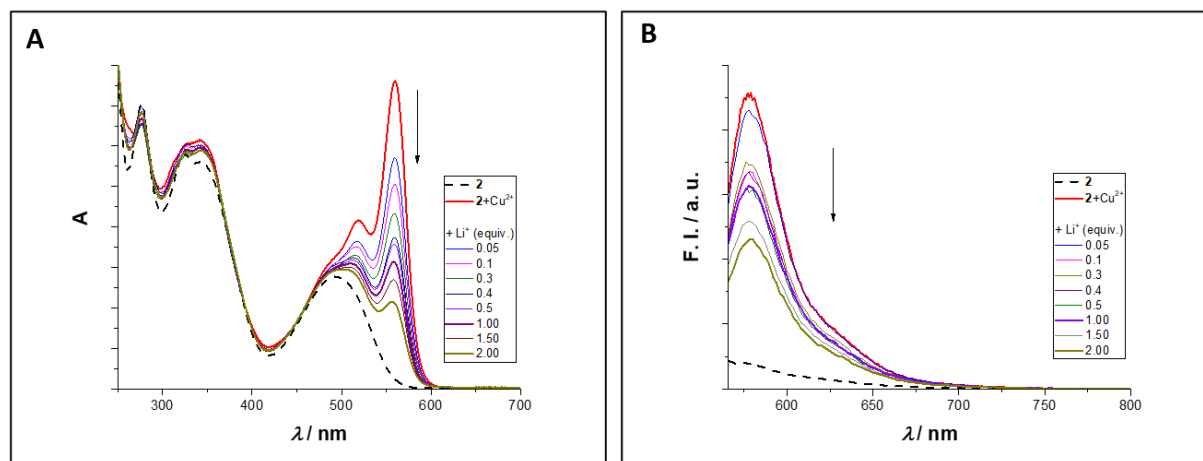

**Figure S12.** Absorbance (A) and fluorescence (B, using  $\lambda_{\text{exc}} = 560$  nm) spectra of chemosensor 2+Cu<sup>2+</sup> with increasing concentrations of Li<sup>+</sup> (up to 2 equiv.).

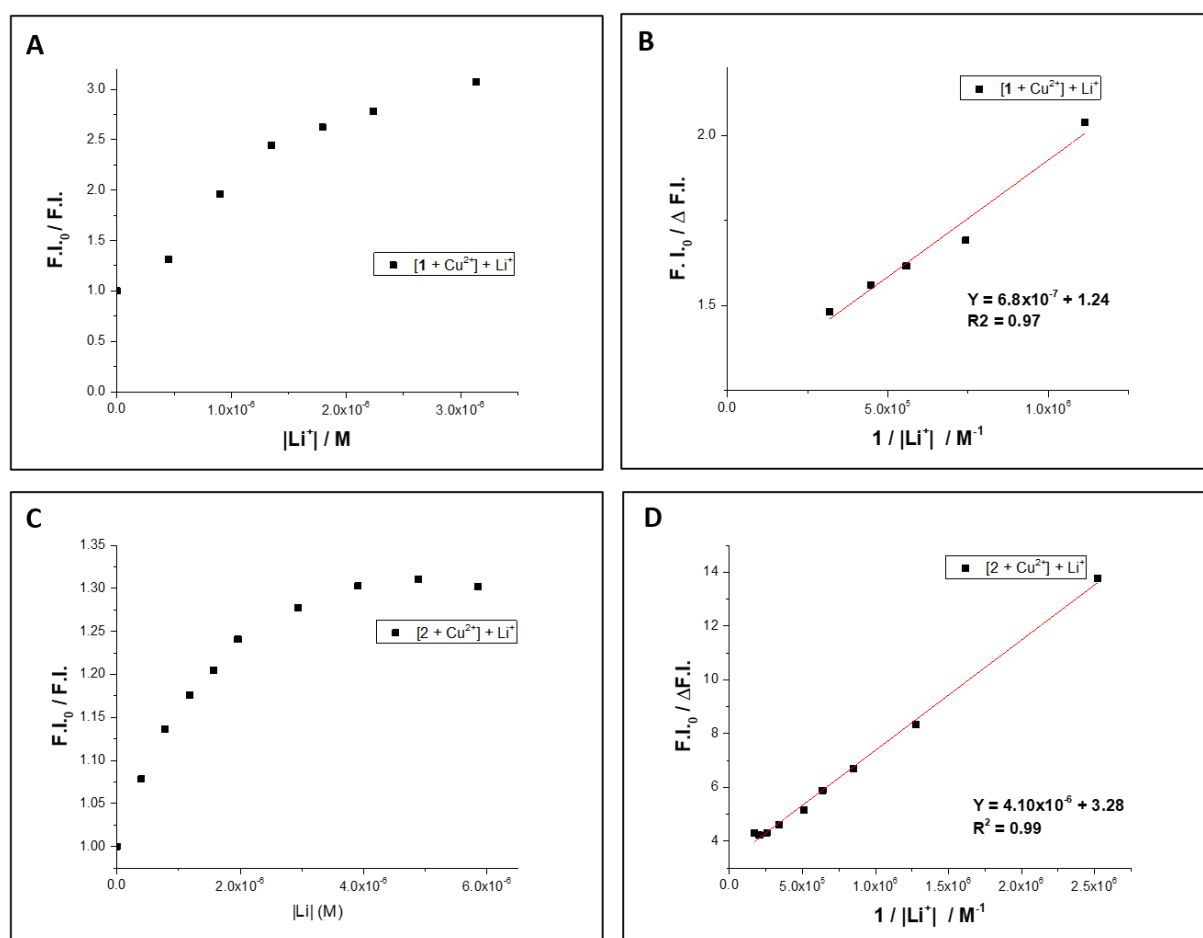

**Figure S13.** Stern-Volmer graphical representations for 1+Cu<sup>2+</sup> (A and C – modified version) and 2+Cu<sup>2+</sup> (B and D – modified version) in the presence of Li<sup>+</sup>.

### Absorbance and fluorescence measurements of chemosensor 2+Cu<sup>2+</sup> in the presence of Li(CH<sub>3</sub>COO) and LiBr salts

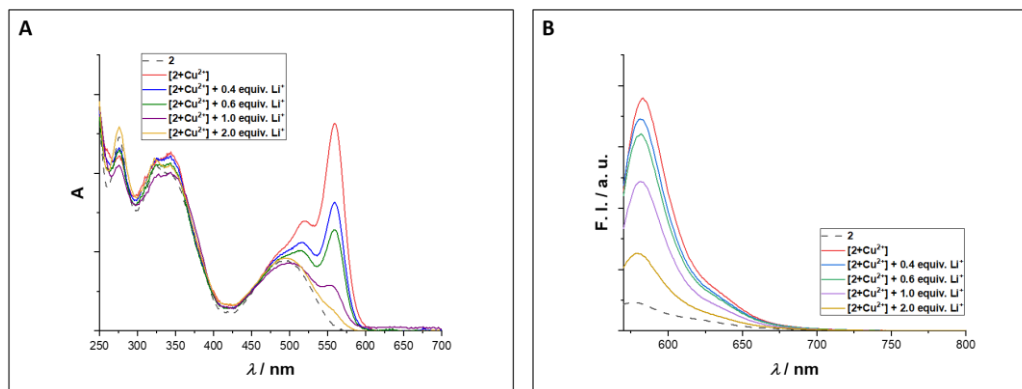

**Figure S14.** Absorbance (A) and fluorescence (B, using  $\lambda_{\text{exc}} = 560$  nm) spectra of chemosensor 2+Cu<sup>2+</sup> with increasing concentrations of Li<sup>+</sup> (up to 2 equiv.), using Li(CH<sub>3</sub>COO) salt.

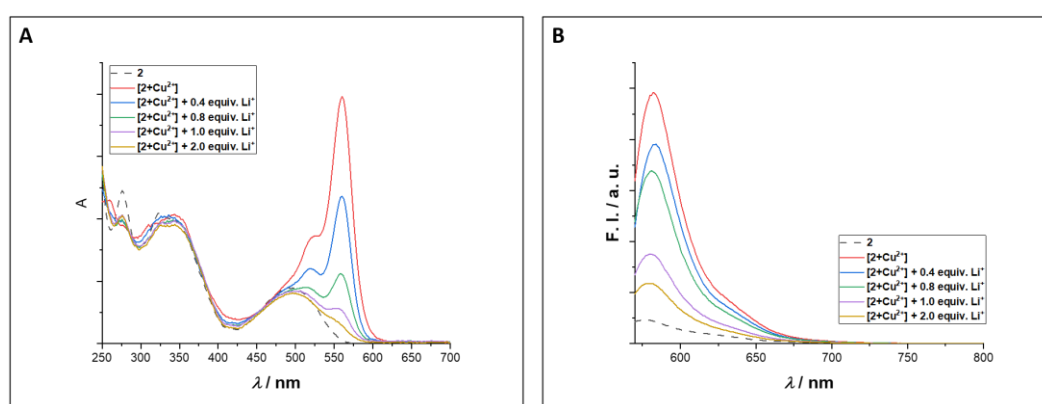

**Figure S15.** Absorbance (A) and fluorescence (B, using  $\lambda_{\text{exc}} = 560$  nm) spectra of chemosensor 2+Cu<sup>2+</sup> with increasing concentrations of Li<sup>+</sup> (up to 2 equiv.), using LiBr salt.

### Absorbance and fluorescence measurements of chemosensors 1+Cu<sup>2+</sup> and 2+Cu<sup>2+</sup> in the presence of CN<sup>-</sup>

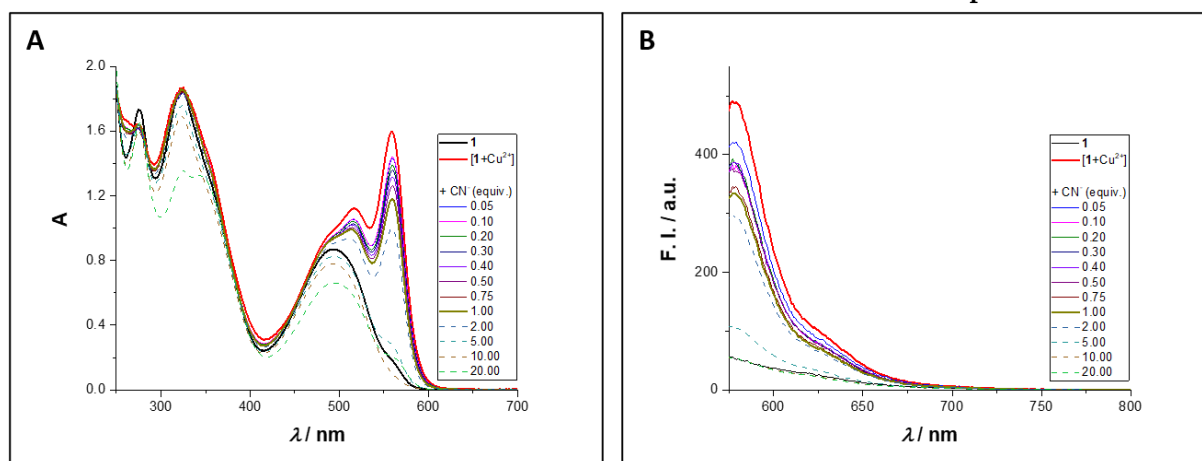

**Figure S16.** Absorbance (A) and fluorescence (B, using  $\lambda_{\text{exc}} = 560$  nm) spectra of chemosensor 1+Cu<sup>2+</sup> with increasing concentrations of CN<sup>-</sup> (up to 20 equiv.).

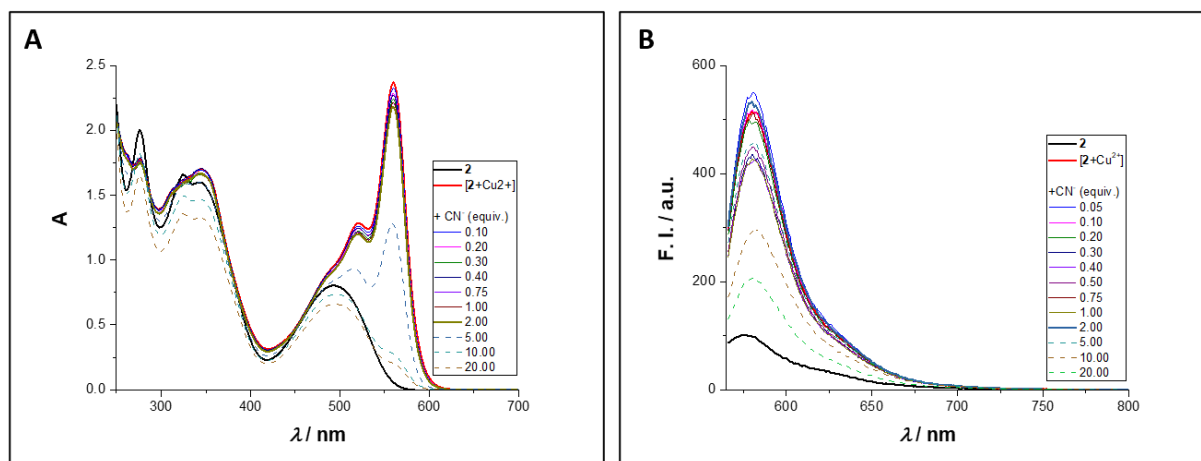

**Figure S17.** Absorbance (A) and fluorescence (B, using  $\lambda_{exc} = 560$  nm) spectra of chemosensor **2**+Cu<sup>2+</sup> with increasing concentrations of CN<sup>-</sup> (up to 20 equiv.).

The results showed that upon addition of CN<sup>-</sup> (up to 1 equiv.) to a solution of **1**+Cu<sup>2+</sup>, a small decrease in the absorbance band at 560 nm and in the emission intensity at 577 nm was observed, around 30% (Figure S17). This is not the case for **2**+Cu<sup>2+</sup> where the decrease is not relevant when 2 equiv. of CN<sup>-</sup> are added (Figure S17). Further increase in CN<sup>-</sup> up to 20 equiv. reveal a more significative decrease both in absorption and emission for both **1**+Cu<sup>2+</sup> and **2**+Cu<sup>2+</sup>, however the decrease is, in general, not linearly correlated with the increase in CN<sup>-</sup> concentration. For both chemosensors, the addition of 5 equiv. or more of CN<sup>-</sup> concentration also caused the decrease in the absorption band at 493 nm.

**Stern-Volmer graphical representations of chemosensor **1**+Cu<sup>2+</sup> in the presence of CN<sup>-</sup>**

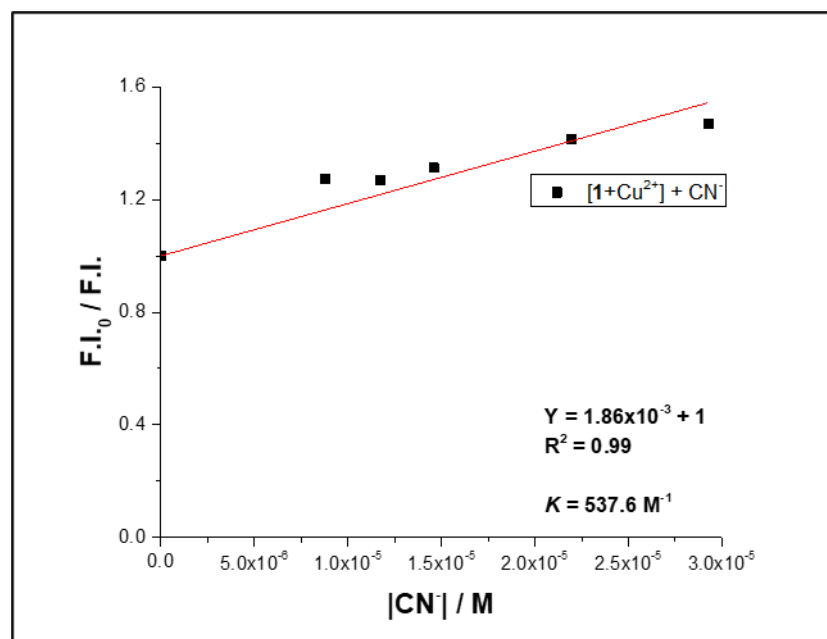

**Figure S18.** Stern-Volmer graphical representation for the complex **1**+Cu<sup>2+</sup> in the presence of CN<sup>-</sup>.
